# Supplementary material
Source: Springer Nature journal article supplement (https://www.springermedizin.de/resource/supplementary/12913_2010_1629_MOESM1_ESM.pdf/9528650)

Percentage of inpatients with ADE

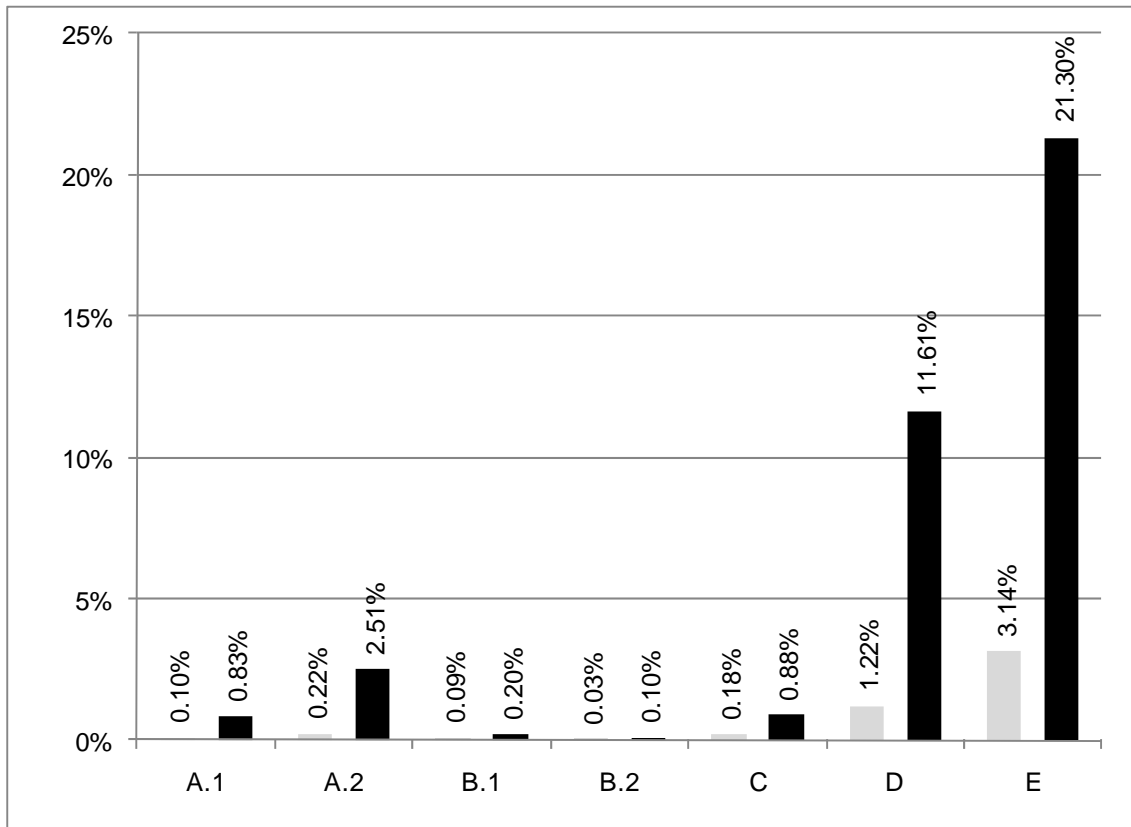

Categories

Supplement: MOESM1 [file 9528650]
